# Supplementary material
Source: PubMed Central journal article supplement (PMC8049341)
Supplement: jnm243949SupplementaryData.pdf [file jnm243949SupplementaryData.pdf]

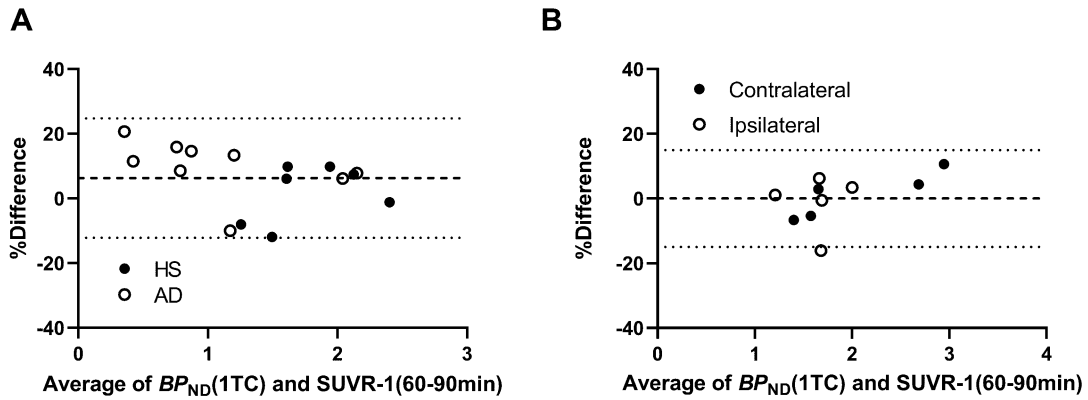

**Supplemental Figure 1:** Bland-Altman plots between 1TC  $BP_{ND}$  and SUVR-1 values in (A) the hippocampus of HSs and ADs and (B) contralateral and ipsilateral hippocampus of EPs.

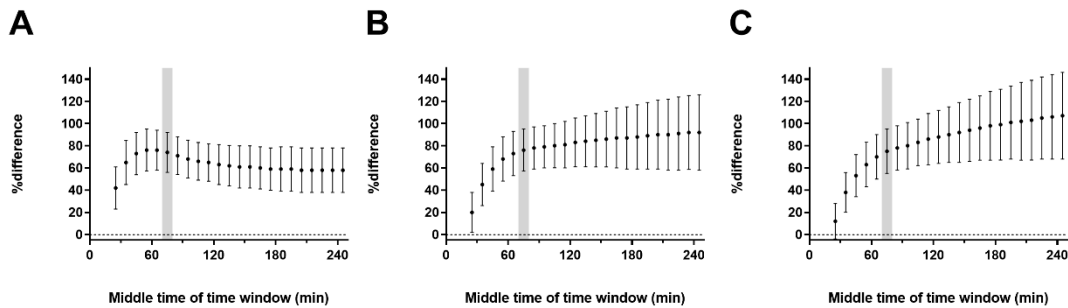

**Supplemental Figure 2:** Mean  $\pm$  SD of %difference between TTP and  $V_T$  values in (A) centrum semiovale, (B) frontal cortex, and (C) hippocampus. The 60-90 min time window is marked in gray.

**Supplemental Table 1: Demographics of neuropsychiatric subjects.**

| Diagnosis                     | Number |
|-------------------------------|--------|
| Alzheimer's disease (2)       | 11     |
| Bipolar                       | 1      |
| Cannabis dependence           | 9      |
| Cocaine dependence            | 14     |
| Epilepsy                      | 5      |
| Major Depressive Disorder (3) | 26     |
| Parkinson's disease (4)       | 2      |
| PTSD                          | 10     |
| Schizophrenia                 | 12     |
| Healthy (1-5)                 | 51     |

The references show the data that have been published elsewhere.

**Supplemental Table 2: Comparisons between TTP and  $V_T(90 \text{ min})$  and SUVR-1 and  $BP_{ND}(90 \text{ min})$  in neuropsychiatric subjects (13 regions per subject,  $n = 90$ ).**

| Time window for TTP and SUVR-1 | $x = V_T, y = \text{TTP}$ |           |       | $x = BP_{ND}, y = \text{SUVR-1}$ |           |       |
|--------------------------------|---------------------------|-----------|-------|----------------------------------|-----------|-------|
|                                | Slope                     | Intercept | $R^2$ | Slope                            | Intercept | $R^2$ |
| 10-40 min                      | 1.04                      | 2.20      | 0.71  | 0.64                             | 0.39      | 0.81  |
| 20-50 min                      | 1.32                      | 1.84      | 0.75  | 0.72                             | 0.29      | 0.88  |
| 30-60 min                      | 1.49                      | 1.32      | 0.78  | 0.79                             | 0.24      | 0.93  |
| 40-70 min                      | 1.61                      | 0.84      | 0.80  | 0.85                             | 0.19      | 0.94  |
| 50-80 min                      | 1.70                      | 0.47      | 0.81  | 0.91                             | 0.13      | 0.93  |
| 60-90 min                      | 1.78                      | 0.16      | 0.81  | 0.96                             | 0.06      | 0.93  |

**Supplemental Table 3. %difference of TTP vs.  $V_T(90 \text{ min})$  and SUVR-1 vs.  $BP_{ND}(90 \text{ min})$  in neuropsychiatric subjects ( $n = 90$ )**

| Parameter                            | Regions           | 10-40 min | 20-50 min | 30-60 min | 40-70 min | 50-80 min | 60-90 min |
|--------------------------------------|-------------------|-----------|-----------|-----------|-----------|-----------|-----------|
| TTP vs. $V_T(90 \text{ min})$        | Cerebral cortex   | 14 ± 19   | 40 ± 23   | 54 ± 24   | 64 ± 25   | 72 ± 25   | 78 ± 26   |
|                                      | Subcortical       | 22 ± 22   | 47 ± 25   | 60 ± 25   | 68 ± 25   | 74 ± 26   | 79 ± 27   |
|                                      | Cerebellum        | 29 ± 21   | 53 ± 24   | 65 ± 25   | 72 ± 25   | 78 ± 25   | 82 ± 26   |
|                                      | Centrum semiovale | 42 ± 22   | 65 ± 25   | 73 ± 25   | 77 ± 25   | 79 ± 26   | 81 ± 28   |
|                                      | Whole brain       | 19 ± 21   | 44 ± 24   | 58 ± 25   | 67 ± 25   | 73 ± 26   | 79 ± 26   |
| SUVR-1 vs. $BP_{ND}(90 \text{ min})$ | Cerebral cortex   | -25 ± 8   | -20 ± 7   | -14 ± 6   | -9 ± 6    | -5 ± 7    | -2 ± 7    |
|                                      | Subcortical       | -19 ± 13  | -15 ± 10  | -11 ± 8   | -7 ± 7    | -4 ± 7    | -1 ± 8    |
|                                      | Cerebellum        | -12 ± 8   | -10 ± 6   | -7 ± 5    | -4 ± 5    | -1 ± 6    | 2 ± 7     |
|                                      | Whole brain       | -22 ± 11  | -17 ± 9   | -12 ± 7   | -8 ± 7    | -4 ± 7    | -1 ± 8    |

Data are mean  $\pm$  SD over all subjects and over all regions in each category

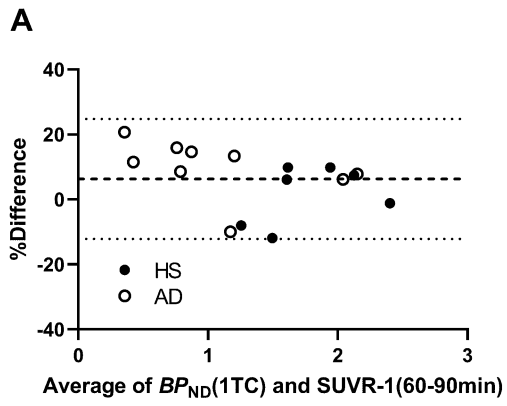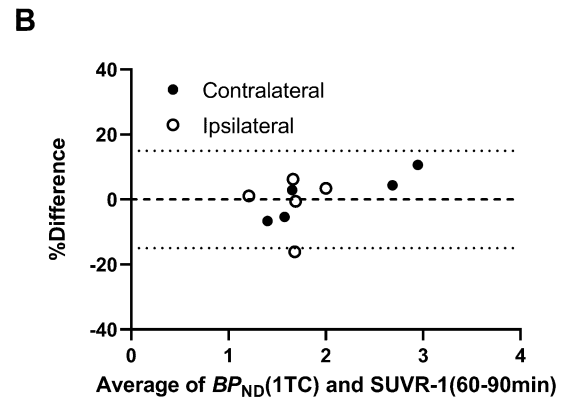

ry.
